# Supplementary material for: Effectiveness of newborn infant parasympathetic evaluation (NIPE) index for guiding intraoperative fentanyl administration in children under 2 years: a randomized controlled trial
Source: PeerJ journal article supplement (doi:10.7717/peerj.18267), 2024-10-08
Supplement: Study_protocol_NIPE.pdf [file Study_protocol_NIPE.pdf]

**ClinicalTrials.gov PRS DRAFT Receipt (Working Version)**

Last Update: 04/21/2024 23:02

**ClinicalTrials.gov ID: NCT05758090**

---

## Study Identification

Unique Protocol ID: HE651243

Brief Title: Newborn Infant Parasympathetic Evaluation (NIPE) for Guiding Intraoperative Fentanyl in Children Under 2 Years

Official Title: Comparison of Newborn Infant Parasympathetic Evaluation (NIPE) Index Versus Standard Hemodynamic Response for Guiding Intraoperative Fentanyl Administration in Children Younger Than 2 Years Under General Anesthesia

Secondary IDs:

## Study Status

Record Verification: April 2024

Overall Status: Completed

Study Start: March 10, 2023 [Actual]

Primary Completion: December 31, 2023 [Actual]

Study Completion: December 31, 2023 [Actual]

## Sponsor/Collaborators

Sponsor: Khon Kaen University

Responsible Party: Principal Investigator

Investigator: Thepakorn Sathitkarnmanee [tsathitkarnmanee]

Official Title: Associate Professor

Affiliation: Khon Kaen University

Collaborators:

## Oversight

U.S. FDA-regulated Drug: No

U.S. FDA-regulated Device: No

U.S. FDA IND/IDE: No

Human Subjects Review: Board Status: Approved

Approval Number: HE651243

Board Name: Khon Kaen University Ethics Committee in Human Research

Board Affiliation: Khon Kaen University

Phone: +66897141913

Email:

Address:

123 Mitrapap road  
Ampur Muang, Khon Kaen  
40002, Thailand

Data Monitoring: No  
FDA Regulated Intervention: No

## Study Description

**Brief Summary:** During general anesthesia, objective monitoring for analgesia is still lacking. The administration of opioids relies on the experience of the anesthesiologist. There are some monitors, e.g., Analgesia Nociception Index (ANI), showing that they can evaluate analgesia in adults. Recently, a Newborn Infant Parasympathetic Evaluation (NIPE) monitor was released for assessing analgesia in children with age less than 2 years. The investigators aim to assess the efficacy of NIPE as a guide for intraoperative fentanyl administration in children under 2 years.

**Detailed Description:** During balanced anesthesia, hypnosis can be monitored with BIS, muscle relaxation can be monitored with a train-of-four, however, analgesia lacks precise monitoring. The anesthesiologist administers narcotics according to clinical signs and experience. Analgesia Nociception Index (ANI) has been introduced as an objective monitor for analgesia in adults. Recently, a Newborn Infant Parasympathetic Evaluation (NIPE) monitor has been introduced to assess analgesia in children under 2 years, however, clinical studies regarding its clinical efficacy are scarce.

The objective of this study is to assess the efficacy of NIPE as a guide for intraoperative fentanyl administration in children under 2 years.

## Conditions

Conditions: Post Operative Pain  
Analgesia  
Children, Only  
Narcotic Use

Keywords:

## Study Design

Study Type: Interventional  
Primary Purpose: Treatment  
Study Phase: N/A  
Interventional Study Model: Parallel Assignment  
Number of Arms: 2  
Masking: Double (Participant, Outcomes Assessor)  
Allocation: Randomized  
Enrollment: 70 [Actual]

## Arms and Interventions

| Arms                                                                                                         | Assigned Interventions                                                                                                                                                                                                                                                                                                                       |
|--------------------------------------------------------------------------------------------------------------|----------------------------------------------------------------------------------------------------------------------------------------------------------------------------------------------------------------------------------------------------------------------------------------------------------------------------------------------|
| Experimental: Group NIPE<br>Intraoperative fentanyl administration will be guided by NIPE protocol           | Procedure/Surgery: NIPE monitor<br>Procedure/Surgery: NIPE protocol. Give intraoperative fentanyl according to NIPE value. NIPE score 50-70 indicates optimal narcotic effect. NIPE score > 70 indicated overdosage of narcotic and narcotic should be withheld. NIPE score < 50 indicates inadequate narcotic and narcotic should be given. |
| Placebo Comparator: Group Control<br>Intraoperative fentanyl administration will be guided by clinical signs | Procedure/Surgery: Control<br>Procedure/Surgery: Standard protocol. Give intraoperative fentanyl according to vital signs.                                                                                                                                                                                                                   |

## Outcome Measures

Primary Outcome Measure:

1. Postoperative pain: Face, Legs, Activity, Cry, Consolability scale (FLACC scale)  
Assess pain using a FLACC score every 15 minutes. FLACC has a range from 0 to 10 with 0 indicates no pain while 10 indicates worst pain. NRS of 0-3 is mild, 4-6 is moderate, and 7-10 is severe pain.

[Time Frame: During 120 minutes in PACU]

Secondary Outcome Measure:

2. Postoperative fentanyl consumption  
Fentanyl administration in PACU
3. Postoperative sedation score  
Sedation score (0-3; higher scores mean a worse outcome) in PACU

[Time Frame: During 120 minutes in PACU]

## Eligibility

Minimum Age: 1 Months

Maximum Age: 2 Years

Sex: All

Gender Based: No

Accepts Healthy Volunteers: No

Criteria: Inclusion Criteria:

- Newborn up to 2 years old
- ASA Status 1-2
- Undergoing elective surgery of upper part of body

Exclusion Criteria:

- Premature
- Arrhythmia
- Concomitant use of regional anesthesia
- Plan for ICU admission

## Contacts/Locations

Central Contact Person: Thepakorn Sathitkammanee, MD  
Telephone: 66-81-9547622  
Email: thepakorns@gmail.com

Central Contact Backup: Sirirat Tribuddharat, MD, PhD  
Telephone: 66-81-6205920  
Email: sirirat.tribuddharat@gmail.com

Study Officials: Sirirat Tribuddharat, MD, PhD  
Study Chair  
Khon Kaen University

Locations: **Thailand**  
Faculty of Medicine, Khon Kaen University  
Khon Kaen, Thailand, 40002  
Contact: Thepakorn Sathitkammanee, MD +66819547622  
thepakorns@gmail.com  
Principal Investigator: Sirirat Tribuddharat, MD, PhD

## IPDSharing

Plan to Share IPD: No

## References

Citations: **[Study Results]** Weber F, Roeleveld HG, Geerts NJE, Warmenhoven AT, Schroder R, de Leeuw TG. The heart rate variability-derived Newborn Infant Parasympathetic Evaluation (NIPE) Index in pediatric surgical patients from 0 to 2 years under sevoflurane anesthesia-A prospective observational pilot study. *Paediatr Anaesth*. 2019 Apr;29(4):377-384. doi: 10.1111/pan.13613. Epub 2019 Mar 21. PubMed 30793426

**[Study Results]** Recher M, Boukhris MR, Jeanne M, Storme L, Leteurtre S, Sabourdin N, De Jonckheere J. The newborn infant parasympathetic evaluation in pediatric and neonatology: a literature review. *J Clin Monit Comput*. 2021 Oct;35(5):959-966. doi: 10.1007/s10877-021-00670-8. Epub 2021 Feb 15. PubMed 33590418

**[Study Results]** Lim BG. Nociception monitoring tools using autonomic tone changes for intraoperative analgesic guidance in pediatric patients. *Anesth Pain Med (Seoul)*. 2019 Oct 31;14(4):380-392. doi: 10.17085/apm.2019.14.4.380. PubMed 33329766

**[Study Results]** Zhang K, Wang S, Wu L, Song Y, Cai M, Zhang M, Zheng J. Newborn infant parasympathetic evaluation (NIPE) as a predictor of hemodynamic response in children younger than 2 years under general anesthesia: an observational pilot study. *BMC Anesthesiol*. 2019 Jun 11;19(1):98. doi: 10.1186/s12871-019-0774-y. PubMed 31185928

Links:

Available IPD/Information:
