# Supplementary material for: Effectiveness of newborn infant parasympathetic evaluation (NIPE) index for guiding intraoperative fentanyl administration in children under 2 years: a randomized controlled trial
Source: PeerJ. 2024 Oct 8;12:e18267. doi: 10.7717/peerj.18267 (PMC11468978; doi:10.7717/peerj.18267)
Supplement: Supplemental Information 1 [file peerj-12-18267-s001.xlsx]

## Sheet: Group Control
																	Outcome
No	Age		Sex	BW (kg)	HT (cm)	U/D		Dx	Operation	Op time				Blood loss (ml)	intra-op Fentanyl		FLACC				Post-op Fentanyl				N/V				Sedation score				RS depression
	year	month								start	end	total	total (min)		mcg	mcg/kg/hr	0	0.5	1	2	0	0.5	1	2	0	0.5	1	2	0	0.5	1	2	0	0.5	1	2
1	0	9	2	5.4	70	0	0	Unilat cleft lip	Repair of lip	09:00:00	12:10:00	3:10:00	190	5	12.5	0.730994	5	1	2	2	5	0	0	0	0	0	0	0	0	2	0	0	0	0	0	0
2	0	3	2	4.7	59	0	0	Unilat cleft lip & palate	Repair of lip	08:40:00	11:25:00	2:45:00	165	1	12.5	0.967118	10	3	0	0	2.5	0	0	0	0	0	0	0	0	2	1	0	0	0	0	0
3	1	8	1	10	78	0	0	Unilat cleft lip	Repair of lip	09:20:00	12:15:00	2:55:00	175	2	35	1.2	1	0	0	0	0	0	0	0	0	0	0	0	2	2	1	0	0	0	0	0
4	0	7	1	6	62	1	VACTREL	Unilat cleft lip and palate	Repair of lip	09:45:00	13:45:00	4:00:00	240	20	15	0.625	5	5	2	1	5	5	0	0	0	0	0	0	0	0	1	0	0	0	0	0
5	0	3	1	6	60	0	0	Unilat cleft lip	Repair of lip	08:40:00	10:30:00	1:50:00	110	1	12.5	1.13636	2	0	0	0	0	0	0	0	0	0	0	0	1	1	0	0	0	0	0	0
6	0	2	1	5	56	0	0	Unilat cleft lip	Repair of lip	09:15:00	12:30:00	3:15:00	195	10	15	0.923077	5	3	2	1	5	0	0	0	0	0	0	0	0	1	1	0	0	0	0	0
7	1	0	2	9.2	74	0	0	Unilat cleft lip and palate	Repair of palate	09:45:00	11:30:00	1:45:00	105	5	7	0.434783	7	6	4	0	1	1	1	0	0	0	0	0	0	0	0	0	0	0	0	0
8	1	0	2	10	78	0	0	Unilat cleft lip and palate	Repair of palate	09:10:00	12:10:00	3:00:00	180	50	40	1.33333	8	2	1	1	5	0	0	0	0	0	0	0	0	2	1	0	0	0	0	0
9	0	11	1	8.9	70	0	0	Unilat cleft lip and palate	Repair of palate	09:40:00	13:00:00	3:20:00	200	40	30	1.01124	2	5	0	0	0	10	0	0	0	0	0	0	1	0	1	0	0	0	0	0
10	1	4	2	9.3	80	0	0	Unilat cleft lip and palate	Repair of palate	09:45:00	11:50:00	2:05:00	125	5	20	1.03226	8	3	2	0	5	0	0	0	0	0	0	0	0	1	1	0	0	0	0	0
11	0	6	2	9	63	0	0	Unilat cleft lip	Repair of lip	09:00:00	11:30:00	2:30:00	150	5	45	2	0	1	1	0	0	0	0	0	0	0	0	0	2	2	2	1	0	0	0	0
12	1	2	1	8.5	72	0	0	Unilat cleft lip and palate	Repair of palate	09:00:00	12:50:00	3:50:00	230	100	30	0.920716	8	1	0	0	5	0	0	0	0	0	0	0	0	2	1	0	0	0	0	0
13	0	5	2	5.2	64	0	0	Unilat cleft lip	Repair of lip	09:00:00	12:05:00	3:05:00	185	1	13	0.810811	1	5	1	0	0	3	0	0	0	0	0	0	1	0	1	0	0	0	0	0
14	0	9	2	9.5	72	1	Pierre robin seuence	Unilat cleft lip and palate	Repair of palate	09:05:00	12:25:00	3:20:00	200	30	30	0.947368	7	6	1	0	5	3	0	0	0	0	0	0	0	0	1	0	0	0	0	0
15	0	2	1	5	57	1	Hypothyroid	Unilat cleft lip and palate	Repair of palate	09:05:00	11:20:00	2:15:00	135	5	3.5	0.311111	10	3	2	1	2	0	0	0	0	0	0	0	0	1	0	0	0	0	0	0
16	0	5	2	8	65	0	0	Unilat cleft lip	Repair of lip	08:40:00	10:50:00	2:10:00	130	10	25	1.44231	6	5	2	0	5	5	0	0	0	0	0	0	0	0	1	0	0	0	0	0
17	0	5	1	7.6	64	0	0	Unilat cleft lip	Repair of lip	09:10:00	12:35:00	3:25:00	205	10	20	0.770218	10	7	3	2	2.5	2.5	0	0	0	0	0	0	0	0	0	0	0	0	0	0
18	1	0	2	10	73	0	0	Unilat cleft lip and palate	Repair of palate	09:10:00	13:00:00	3:50:00	230	70	35	0.913043	2	10	2	0	0	5	0	0	0	0	0	0	1	0	1	0	0	0	0	0
19	1	9	2	9.8	80	1	Pierre robin seuence	Unilat cleft lip and palate	Repair of palate	08:35:00	12:55:00	4:20:00	260	60	40	0.941915	7	8	7	3	5	5	5	0	0	0	0	0	0	0	0	0	0	0	0	0
20	0	6	1	5.8	62	0	0	Unilat cleft lip	Repair of lip	09:20:00	11:25:00	2:05:00	125	3	10	0.827586	10	2	0	0	2	0	0	0	0	0	0	0	0	1	0	0	0	0	0	0
21	0	8	1	7.6	67	0	0	cataract RE	PPV RE	09:00:00	10:35:00	1:35:00	95	1	12.5	1.03878	5	0	0	0	0	0	0	0	0	0	0	0	0	1	0	0	0	0	0	0
22	2	0	2	10	86	0	0	Bilat OME	Bilat myringotomy	09:00:00	09:55:00	0:55:00	55	1	10	1.09091	10	0	0	0	5	0	0	0	0	0	0	0	0	1	0	0	0	0	0	0
25	1	2	2	11	78	0	0	Unilat cleft lip and palate	Repair of palate	09:00:00	12:30:00	3:30:00	210	20	17.5	0.454545	10	8	5	3	5	5	5	0	0	0	0	0	0	0	0	0	0	0	0	0
24	1	10	1	14.5	75	0	0	ptosis LE	frontalis sling LE	11:15:00	12:10:00	0:55:00	55	1	25	1.88088	2	0	0	0	0	0	0	0	0	0	0	0	1	2	1	0	0	0	0	0
25	0	5	2	7.2	64	0	0	Unilat cleft lip	Repair of lip	08:45:00	10:55:00	2:10:00	130	2	20	1.28205	8	2	0	0	5	0	0	0	0	0	0	0	0	1	0	0	0	0	0	0
26	0	7	2	7.5	58	0	0	Unilat cleft lip	Repair of lip	09:15:00	13:30:00	4:15:00	255	5	20	0.627451	10	0	0	0	5	0	0	0	0	0	0	0	0	1	1	0	0	0	0	0
27	0	3	1	5.6	59	0	0	Unilat cleft lip and palate	Repair of lip	08:40:00	10:50:00	2:10:00	130	3	15	1.23626	8	0	0	0	4	0	0	0	0	0	0	0	0	1	0	0	0	0	0	0
28	1	2	1	7	67	1	Thalassemia	Bilat OME	Bilat myringotomy	09:05:00	10:55:00	1:50:00	110	1	20	1.55844	0	0	0	0	0	0	0	0	0	0	0	0	2	2	1	0	0	0	0	0
29	0	3	1	5.2	64	0	0	Unilat cleft lip and palate	Repair of lip	08:45:00	10:45:00	2:00:00	120	2	5	0.480769	8	2	0	0	2	0	0	0	0	0	0	0	0	1	0	0	0	0	0	0
30	1	10	2	10	80	0	0	Unilat cleft lip and palate	Repair of palate	09:00:00	12:00:00	3:00:00	180	10	25	0.833333	6	2	0	0	5	0	0	0	0	0	0	0	0	1	0	0	0	0	0	0
31	0	11	1	7.8	89	0	0	Unilat cleft lip and palate	Repair of palate	08:45:00	12:05:00	3:20:00	200	30	20	0.769231	6	0	0	0	5	0	0	0	0	0	0	0	0	1	1	0	0	0	0	0
32	1	0	2	10	76	0	0	Unilat cleft lip and palate	Repair of palate	09:10:00	12:10:00	3:00:00	180	50	40	1.33333	8	3	2	1	5	0	0	0	0	0	0	0	0	0	0	0	0	0	0	0
33	1	0	1	8	80	0	0	Unilat cleft lip and palate	Repair of palate	08:40:00	11:20:00	2:40:00	160	20	30	1.40625	8	2	0	0	5	0	0	0	0	0	0	0	0	1	1	0	0	0	0	0
34	0	11	1	8	83	0	0	Unilat cleft lip and palate	Repair of lip	08:40:00	11:55:00	3:15:00	195	10	20	0.769231	10	3	2	0	5	0	0	0	0	0	0	0	0	1	0	0	0	0	0	0
35	2	0	2	13	90	0	0	Congenital esotropia	BMR recession	09:00:00	11:15:00	2:15:00	135	1	35	1.19658	7	5	2	0	5	5	0	0	0	0	0	0	0	0	0	0	0	0	0	0
																1.00678	6.28571	2.94286	1.22857	0.428571	3.17143	1.41429	0.314286	0	0	0	0	0	0.314286	0.885714	0.542857	0.0285714	0	0	0	0

## Sheet: Group NIPE
																	Outcome
No	Age		Sex	BW (kg)	HT (cm)	U/D		Dx	Operation	Op time				Blood loss (ml)	intra-op Fentanyl		FLACC				Post-op Fentanyl				N/V				Sedation score				RS depression
	year	month								start	end	total	total (min)		mcg	mcg/kg/hr	0	0.5	1	2	0	0.5	1	2	0	0.5	1	2	0	0.5	1	2	0	0.5	1	2
1	0	5	1	3.3	58	0	0	Unilat cleft lip	Repair of lip	09:05:00	12:35:00	3:30:00	210	5	4	0.34632	7	2	0	0	1	0	0	0	0	0	0	0	0	1	0	0	0	0	0	0
2	1	1	1	10	78	0	0	Unilat cleft lip and palate	Repair of palate	11:35:00	15:10:00	3:35:00	215	40	60	1.67442	1	0	0	0	0	0	0	0	0	0	0	0	1	1	0	0	0	0	0	0
6	0	7	2	6.3	62	0	0	Unilat cleft lip	Repair of lip	08:45:00	11:05:00	2:20:00	140	10	15	1.02041	5	3	2	1	5	0	0	0	0	0	0	0	0	1	1	0	0	0	0	0
4	1	3	1	9.5	77	0	0	Unilat cleft lip and palate	Repair of palate	09:00:00	13:50:00	4:50:00	290	10	55	1.19782	7	4	0	0	5	5	0	0	0	0	0	0	0	0	1	0	0	0	0	0
5	0	4	1	5.9	60	1	PDA, PFO	Unilat cleft lip	Repair of lip	09:05:00	12:15:00	3:10:00	190	20	20	1.07047	4	0	0	0	2.5	0	0	0	0	0	0	0	0	1	0	0	0	0	0	0
6	0	4	1	5.6	60	1	PDA, PFO	Unilat cleft lip	Repair of lip	12:35:00	15:35:00	3:00:00	180	5	20	1.19048	8	5	4	0	2.5	2.5	2.5	0	0	0	0	0	0	0	0	0	0	0	0	0
7	0	11	2	9	68	0	0	Bilat OME	Bilat myringotomy	09:30:00	10:30:00	1:00:00	60	1	10	1.11111	0	0	0	0	0	0	0	0	0	0	0	0	1	0	0	0	0	0	0	0
8	0	3	1	4.1	51	1	G6PD deficiency	Unilat cleft lip and palate	Repair of lip	09:00:00	11:40:00	2:40:00	160	5	12.5	1.14329	3	2	0	0	0	0	0	0	0	0	0	0	0	1	1	0	0	0	0	0
9	1	0	2	8	70	0	0	Unilat cleft lip and palate	Repair of palate	12:15:00	14:45:00	2:30:00	150	10	23	1.15	6	6	5	2	4	4	4	0	0	0	0	0	0	0	0	0	0	0	0	0
10	0	5	1	6	57	1	G6PD deficiency	Unilat cleft lip	Repair of lip	09:15:00	12:10:00	2:55:00	175	3	9	0.514286	0	7	2	0	0	2	0	0	0	0	0	0	2	0	1	0	0	0	0	0
11	0	3	1	5.7	59	0	0	Unilat cleft lip	Repair of lip	09:10:00	12:00:00	2:50:00	170	2	7.5	0.464396	8	5	2	1	5	2.5	0	0	0	0	0	0	0	0	0	0	0	0	0	0
12	0	5	2	8	64	0	0	Unilat cleft lip	Repair of lip	09:20:00	11:45:00	2:25:00	145	10	25	1.2931	3	0	0	0	0	0	0	0	0	0	0	0	0	1	0	0	0	0	0	0
13	0	3	1	5.7	63	0	0	Unilat cleft lip	Repair of lip	09:30:00	10:50:00	1:20:00	80	10	8	1.05263	2	0	0	0	0	0	0	0	0	0	0	0	0	1	0	0	0	0	0	0
14	2	0	1	9.8	66	0	0	Unilat cleft lip	Repair of lip	09:15:00	12:10:00	2:55:00	175	20	30	1.04956	7	5	0	0	5	5	0	0	0	0	0	0	0	0	0	0	0	0	0	0
15	0	56	2	7.9	62	0	0	Unilat cleft lip	Repair of lip	09:10:00	11:50:00	2:40:00	160	5	10	0.474684	8	4	0	0	5	5	0	0	0	0	0	0	0	0	0	0	0	0	0	0
16	1	6	2	10	72	0	0	cataract LE	PPV LE	09:05:00	10:45:00	1:40:00	100	1	10	0.6	5	0	0	0	5	0	0	0	0	0	0	0	0	1	0	0	0	0	0	0
17	0	6	2	6	60	0	0	Unilat cleft lip	Repair of lip	09:00:00	11:10:00	2:10:00	130	2	10	0.769231	10	0	0	0	5	0	0	0	0	0	0	0	0	2	1	0	0	0	0	0
18	0	5	1	7.3	67	0	0	Unilat cleft lip	Repair of lip	09:15:00	11:45:00	2:30:00	150	10	10	0.547945	8	2	0	0	3	0	0	0	0	0	0	0	0	1	0	0	0	0	0	0
19	1	1	1	9.6	75	0	0	Unilat cleft lip and palate	Repair of palate	13:00:00	17:00:00	4:00:00	240	80	30	0.78125	10	1	0	0	5	0	0	0	0	0	0	0	0	1	0	0	0	0	0	0
20	1	1	1	9.6	75	0	0	Unilat cleft lip and palate	Repair of palate	09:00:00	12:30:00	3:30:00	210	80	40	1.19048	7	5	2	0	5	5	0	0	0	0	0	0	0	0	0	0	0	0	0	0
21	1	0	2	7	73	1	HbH disease	Unilat cleft lip and palate	Repair of palate	08:40:00	11:40:00	3:00:00	180	20	20	0.952381	8	5	0	0	2.5	2.5	0	0	0	0	0	0	0	0	1	0	0	0	0	0
22	1	2	2	7.8	75	0	0	Unilat cleft lip and palate	Repair of palate	12:30:00	16:10:00	3:40:00	220	20	35	1.22378	8	6	2	0	2.5	2.5	0	0	0	0	0	0	0	0	0	0	0	0	0	0
23	1	6	2	10	76	0	0	Unilat cleft palate	Repair of palate	08:05:00	12:00:00	3:55:00	235	60	20	0.510638	10	8	3	0	5	5	0	0	0	0	0	0	0	0	0	0	0	0	0	0
24	0	11	1	9.2	74	0	0	Unilat cleft lip and palate	Repair of palate	11:30:00	14:05:00	2:35:00	155	50	40	1.68303	0	8	0	0	0	5	0	0	0	0	0	0	2	0	0	0	0	0	0	0
25	0	3	1	5.5	40	0	0	Unilat cleft lip	Repair of lip	09:05:00	11:15:00	2:10:00	130	4	7.5	0.629371	10	2	0	0	2.5	0	0	0	0	0	0	0	0	1	0	0	0	0	0	0
26	0	6	1	5.8	62	0	0	Unilat cleft lip	Repair of lip	09:20:00	11:10:00	1:50:00	110	3	10	0.940439	6	0	0	0	2	0	0	0	0	0	0	0	0	1	0	0	0	0	0	0
27	1	7	2	8.5	74	0	0	Unilat cleft lip and palate	Repair of palate	08:45:00	13:30:00	4:45:00	285	100	40	0.990712	5	4	0	0	5	5	0	0	0	0	0	0	0	0	0	0	0	0	0	0
28	1	5	2	9.4	86	1	HbE disease	Unilat cleft lip and palate	Repair of palate	08:30:00	11:55:00	3:25:00	205	30	40	1.24546	6	0	0	0	5	0	0	0	0	0	0	0	0	2	1	0	0	0	0	0
29	1	1	1	7.5	68	1	G6PD deficiency	Unilat cleft lip and palate	Repair of palate	09:10:00	13:10:00	4:00:00	240	50	25	0.833333	7	5	4	1	5	5	5	0	0	0	0	0	0	0	0	0	0	0	0	0
30	0	4	1	5.2	61	0	0	Unilat cleft lip and palate	Repair of lip	09:10:00	11:35:00	2:25:00	145	10	7.5	0.596817	1	0	0	0	0	0	0	0	0	0	0	0	2	1	0	0	0	0	0	0
31	0	4	1	5.6	60	1	PDA	Unilat cleft lip and palate	Repair of lip	08:40:00	11:05:00	2:25:00	145	2	12	0.8867	8	2	0	0	5	0	0	0	0	0	0	0	0	1	0	0	0	0	0	0
32	1	3	2	8.7	76	0	0	Unilat cleft lip and palate	Repair of palate	08:45:00	12:10:00	3:25:00	205	40	35	1.17746	1	0	0	0	0	0	0	0	0	0	0	0	1	1	0	0	0	0	0	0
33	1	1	1	7	63	1	Multiple anomaly	Unilat cleft lip and palate	Repair of palate	09:10:00	13:20:00	4:10:00	250	120	29	0.994286	8	6	5	2	5	2.5	2.5	0	0	0	0	0	0	0	0	0	0	0	0	0
34	1	2	1	9.4	77	1	Thalassemia	Unilat cleft palate	Repair of palate	11:00:00	14:05:00	3:05:00	185	50	35	1.20759	8	0	0	0	5	0	0	0	0	0	0	0	0	2	1	0	0	0	0	0
35	1	0	1	14	79	0	0	Unilat cleft palate	Repair of palate	08:40:00	11:35:00	2:55:00	175	50	55	1.34694	8	5	0	0	5	5	0	0	0	0	0	0	0	0	1	0	0	0	0	0
																0.967452	5.8	2.91429	0.885714	0.2	3.07143	1.81429	0.4	0	0	0	0	0	0.257143	0.6	0.257143	0	0	0	0	0
