# Supplementary material for: Effectiveness of newborn infant parasympathetic evaluation (NIPE) index for guiding intraoperative fentanyl administration in children under 2 years: a randomized controlled trial
Source: PeerJ. 2024 Oct 8;12:e18267. doi: 10.7717/peerj.18267 (PMC11468978; doi:10.7717/peerj.18267)
Supplement: Supplemental Information 2 [file peerj-12-18267-s002.xlsx]

## Sheet: 1
		HR	NIPE	Fentanyl				SBP	DBP	MAP
09:00:00	110/78	120	38	5				110	78	88.6667
09:05:00	88/42	129	52					88	42	57.3333
09:10:00	78/40	131	56					78	40	52.6667
09:15:00	79/39	130	57					79	39	52.3333
09:20:00	77/40	132	57					77	40	52.3333
09:25:00	85/48	158	53	5				85	48	60.3333
09:30:00	78/42	145	50					78	42	54
09:35:00	77/38	144	57					77	38	51
09:40:00	76/39	147	58					76	39	51.3333
09:45:00	75/37	141	59					75	37	49.6667
09:50:00	76/38	142	59					76	38	50.6667
09:55:00	75/35	143	60					75	35	48.3333
10:00:00	78/41	143	62					78	41	53.3333
10:05:00	69/40	141	65					69	40	49.6667
10:10:00	71/39	135	67					71	39	49.6667
10:15:00	72/36	136	65					72	36	48
10:20:00	70/37	139	63					70	37	48
10:25:00	69/36	134	61					69	36	47
10:30:00	75/35	132	60					75	35	48.3333
10:35:00	80/37	140	60					80	37	51.3333
10:40:00	85/36	148	54					85	36	52.3333
10:45:00	90/40	150	51	2.5				90	40	56.6667
10:50:00	92/42	160	56					92	42	58.6667
10:55:00	87/38	152	55					87	38	54.3333
11:00:00	88/37	151	58					88	37	54
11:05:00	86/36	151	55					86	36	52.6667
11:10:00	90/38	158	54					90	38	55.3333
11:15:00	92/40	165	50	2.5				92	40	57.3333
11:20:00	85/36	140	54					85	36	52.3333
11:25:00	81/37	145	57					81	37	51.6667
11:30:00	82/38	142	58					82	38	52.6667
11:35:00	88/37	140	58					88	37	54
11:40:00	89/42	140	55					89	42	57.6667
11:45:00	95/46	148	52	2.5				95	46	62.3333
11:50:00	91/41	142	57					91	41	57.6667
11:55:00	90/42	155	59					90	42	58
12:00:00	99/39	156	60					99	39	59
12:05:00	98/41	154	62					98	41	60
12:10:00	92/62	170	66					92	62	72

## Sheet: 2
Time	BP	HR	NIPE	Fentanyl				SBP	DBP	MAP
08:40:00	95/51	131	37	10				95	51	65.6667
08:45:00	91/55	149	51					91	55	67
08:50:00	82/49	150	55					82	49	60
08:55:00	80/50	148	56					80	50	60
09:00:00	84/52	141	59					84	52	62.6667
09:05:00	71/48	147	62					71	48	55.6667
09:10:00	79/48	146	65					79	48	58.3333
09:15:00	75/46	145	66					75	46	55.6667
09:20:00	71/45	151	68					71	45	53.6667
09:25:00	70/46	148	69					70	46	54
09:30:00	69/38	142	71					69	38	48.3333
09:35:00	68/39	141	72					68	39	48.6667
09:40:00	65/37	138	69					65	37	46.3333
09:45:00	60/36	135	65					60	36	44
09:50:00	59/34	133	65					59	34	42.3333
09:55:00	60/35	134	63					60	35	43.3333
10:00:00	58/36	136	62					58	36	43.3333
10:05:00	62/35	133	62					62	35	44
10:10:00	61/34	132	62					61	34	43
10:15:00	60/35	134	60					60	35	43.3333
10:20:00	59/33	131	60					59	33	41.6667
10:25:00	60/34	136	59					60	34	42.6667
10:30:00	69/36	139	60					69	36	47
10:35:00	65/38	132	60					65	38	47
10:40:00	67/37	131	58					67	37	47
10:45:00	75/35	138	51	2.5				70	32	44.6667
10:50:00	68/31	136	57					68	31	43.3333
10:55:00	72/33	134	58					72	33	46
11:00:00	71/32	135	59					71	32	45
11:05:00	82/38	150	62					82	38	52.6667
11:10:00	90/41	155	63					90	41	57.3333
11:15:00	79/42	145	64					79	42	54.3333
11:20:00	80/40	144	66					80	40	53.3333
11:25:00	81/41	140	66					81	41	54.3333

## Sheet: 3
Time	BP	HR	NIPE	Fentanyl				SBP	DBP	MAP
09:20:00	98/72	125	41	10				98	72	80.6667
09:25:00	92/73	126	52					92	73	79.3333
09:30:00	89/67	122	56					89	67	74.3333
09:35:00	88/65	120	57					88	65	72.6667
09:40:00	98/69	128	54	10				98	69	78.6667
09:45:00	95/65	126	57					95	65	75
09:50:00	90/55	120	58					90	55	66.6667
09:55:00	89/54	122	59					89	54	65.6667
10:00:00	80/51	120	59					80	51	60.6667
10:05:00	81/49	118	61					81	49	59.6667
10:10:00	79/48	119	62					79	48	58.3333
10:15:00	81/49	118	60					81	49	59.6667
10:20:00	82/47	111	60					82	47	58.6667
10:25:00	78/46	112	61					78	46	56.6667
10:30:00	79/43	111	60					79	43	55
10:35:00	78/42	109	60					78	42	54
10:40:00	77/44	108	59					77	44	55
10:45:00	88/45	115	52	5				88	45	59.3333
10:50:00	81/44	113	56					81	44	56.3333
10:55:00	81/45	116	57					81	45	57
11:00:00	83/43	114	57					83	43	56.3333
11:05:00	84/44	110	58					84	44	57.3333
11:10:00	82/45	111	56					82	45	57.3333
11:15:00	83/42	111	55					83	42	55.6667
11:20:00	90/51	118	53	5				90	51	64
11:25:00	89/53	112	57					89	53	65
11:30:00	88/54	112	59					88	54	65.3333
11:35:00	86/52	114	59					86	52	63.3333
11:40:00	87/54	115	60					87	54	65
11:45:00	86/55	114	59					86	55	65.3333
11:50:00	88/56	115	59					88	56	66.6667
11:55:00	94/57	128	48	5				94	57	69.3333
12:00:00	95/56	125	57					95	56	69
12:05:00	98/55	124	59					98	55	69.3333
12:10:00	95/54	124	62					95	54	67.6667
12:15:00	98/58	124	68					98	58	71.3333

## Sheet: 4
Time	BP	HR	NIPE	Fentanyl				SBP	DBP	MAP
09:45:00	120/80	138	35	5				120	80	93.3333
09:50:00	115/78	131	51					115	78	90.3333
09:55:00	100/58	128	54					100	58	72
10:00:00	98/54	124	58					98	54	68.6667
10:05:00	90/45	123	59					90	45	60
10:10:00	89/42	122	59					89	42	57.6667
10:15:00	81/44	121	60					81	44	56.3333
10:20:00	82/43	120	61					82	43	56
10:25:00	82/46	121	63					82	46	58
10:30:00	80/41	122	65					80	41	54
10:35:00	79/35	123	62					79	35	49.6667
10:40:00	78/36	120	61					78	36	50
10:45:00	77/35	120	61					77	35	49
10:50:00	85/41	134	53	2.5				85	41	55.6667
10:55:00	79/38	125	56					79	38	51.6667
11:00:00	76/37	121	59					76	37	50
11:05:00	75/32	122	60					75	32	46.3333
11:10:00	69/33	121	62					69	33	45
11:15:00	68/32	127	63					68	32	44
11:20:00	70/31	123	63					70	31	44
11:25:00	72/33	117	64					72	33	46
11:30:00	78/41	119	64					78	41	53.3333
11:35:00	117/65	135	48	2.5				117	65	82.3333
11:40:00	91/68	128	57					91	68	75.6667
11:45:00	86/55	126	58					86	55	65.3333
11:50:00	84/50	126	59					84	50	61.3333
11:55:00	80/51	125	61					80	51	60.6667
12:00:00	81/43	125	62					81	43	55.6667
12:05:00	78/42	122	61					78	42	54
12:10:00	79/37	120	61					79	37	51
12:15:00	77/39	122	60					77	39	51.6667
12:20:00	75/38	121	60					75	38	50.3333
12:25:00	90/41	135	55	2.5				90	41	57.3333
12:30:00	80/35	130	59					80	35	50
12:35:00	78/39	128	61					78	39	52
12:40:00	77/33	124	62					77	33	47.6667
12:45:00	77/39	125	62					77	39	51.6667
12:50:00	79/38	125	63					79	38	51.6667
12:55:00	78/35	124	65					78	35	49.3333
13:00:00	77/41	124	62					77	41	53
13:05:00	78/35	125	61					78	35	49.3333
13:10:00	79/39	126	60					79	39	52.3333
13:15:00	78/38	125	59					78	38	51.3333
13:20:00	79/37	122	59					79	37	51
13:25:00	80/36	122	58					80	36	50.6667
13:30:00	118/79	124	55	2.5				118	79	92
13:35:00	85/45	124	61					85	45	58.3333
13:40:00	86/42	122	62					86	42	56.6667
13:45:00	85/43	124	62					85	43	57

## Sheet: 5
Time	BP	HR	NIPE	Fentanyl				SBP	DBP	MAP
08:40:00	92/46	152	40	7.5				92	46	61.3333
08:45:00	88/45	148	52					88	45	59.3333
08:50:00	85/37	145	54					85	37	53
08:55:00	80/39	145	56					80	39	52.6667
09:00:00	85/31	146	57					85	31	49
09:05:00	79/32	142	61					79	32	47.6667
09:10:00	78/30	140	62					78	30	46
09:15:00	78/31	140	62					78	31	46.6667
09:20:00	78/32	142	63					78	32	47.3333
09:25:00	85/38	150	52	2.5				85	38	53.6667
09:30:00	79/34	146	57					79	34	49
09:35:00	79/35	144	58					79	35	49.6667
09:40:00	78/35	145	58					78	35	49.3333
09:45:00	80/36	146	60					80	36	50.6667
09:50:00	79/35	146	59					79	35	49.6667
09:55:00	77/37	140	58					77	37	50.3333
10:00:00	75/36	140	57					75	36	49
10:05:00	78/38	138	56					78	38	51.3333
10:10:00	78/37	136	56					78	37	50.6667
10:15:00	95/58	138	54	2.5				95	58	70.3333
10:20:00	90/50	128	58					90	50	63.3333
10:25:00	110/51	132	59					110	51	70.6667
10:30:00	115/55	130	59					115	55	75

## Sheet: 6
Time	BP	HR	NIPE	Fentanyl				SBP	DBP	MAP
09:15:00	95/75	155	38	5				95	75	81.6667
09:20:00	90/45	148	52					90	45	60
09:25:00	83/45	145	56					83	45	57.6667
09:30:00	81/44	145	57					81	44	56.3333
09:35:00	79/47	142	58					79	47	57.6667
09:40:00	78/45	139	61					78	45	56
09:45:00	74/38	138	62					74	38	50
09:50:00	79/39	137	64					79	39	52.3333
09:55:00	78/45	136	65					78	45	56
10:00:00	78/41	138	67					78	41	53.3333
10:05:00	79/40	140	64					79	40	53
10:10:00	76/37	141	62					76	37	50
10:15:00	79/34	140	60					79	34	49
10:20:00	78/35	141	60					78	35	49.3333
10:25:00	78/33	140	60					78	33	48
10:30:00	78/31	138	61					78	31	46.6667
10:35:00	79/39	138	61					79	39	52.3333
10:40:00	83/42	140	55	1				83	42	55.6667
10:45:00	79/38	136	57					79	38	51.6667
10:50:00	78/38	135	58					78	38	51.3333
10:55:00	79/39	134	60					79	39	52.3333
11:00:00	71/35	132	61					71	35	47
11:05:00	77/36	131	61					77	36	49.6667
11:10:00	68/30	130	62					68	30	42.6667
11:15:00	73/35	128	63					73	35	47.6667
11:20:00	74/35	128	64					74	35	48
11:25:00	74/34	125	64					74	34	47.3333
11:30:00	72/32	126	63					72	32	45.3333
11:35:00	82/40	132	54	1				82	40	54
11:40:00	75/35	121	59					75	35	48.3333
11:45:00	74/35	120	61					74	35	48
11:50:00	77/36	119	63					77	36	49.6667
11:55:00	76/35	118	63					76	35	48.6667
12:00:00	75/31	118	65					75	31	45.6667
12:05:00	74/35	119	67					74	35	48
12:10:00	75/35	119	71					75	35	48.3333
12:15:00	90/45	161	65					90	45	60
12:20:00	98/46	168	60					98	46	63.3333
12:25:00	99/51	175	59					99	51	67
12:30:00	100/51	178	58					100	51	67.3333

## Sheet: 7
Time	BP	HR	NIPE	Fentanyl				SBP	DBP	MAP
08:45:00	95/65	145	35	10				95	65	75
08:50:00	81/49	135	51					81	49	59.6667
08:55:00	81/48	134	55					81	48	59
09:00:00	80/48	132	56					80	48	58.6667
09:05:00	78/47	130	56					78	47	57.3333
09:10:00	75/46	132	57					75	46	55.6667
09:15:00	98/58	142	48	5				98	58	71.3333
09:20:00	95/58	141	51					95	58	70.3333
09:25:00	94/51	141	52					94	51	65.3333
09:30:00	98/58	155	54	5				98	58	71.3333
09:35:00	90/53	151	56					90	53	65.3333
09:40:00	90/55	150	57					90	55	66.6667
09:45:00	90/56	152	59					90	56	67.3333
09:50:00	85/56	151	59					85	56	65.6667
09:55:00	85/50	150	61					85	50	61.6667
10:00:00	89/50	148	62					89	50	63
10:05:00	88/52	145	64					88	52	64
10:10:00	85/50	144	65					85	50	61.6667
10:15:00	85/49	142	65					85	49	61
10:20:00	88/48	141	69					88	48	61.3333
10:25:00	86/48	141	65					86	48	60.6667
10:30:00	89/45	140	64					89	45	59.6667
10:35:00	85/46	141	62					85	46	59
10:40:00	85/46	144	62					85	46	59
10:45:00	89/41	145	61					89	41	57
10:50:00	91/47	147	55	5				91	47	61.6667
10:55:00	89/48	142	59					89	48	61.6667
11:00:00	85/49	141	60					85	49	61
11:05:00	95/45	142	62					95	45	61.6667
11:10:00	95/55	142	63					95	55	68.3333
11:15:00	102/60	150	63					102	60	74
11:20:00	106/62	148	62					106	62	76.6667
11:25:00	104/60	148	60					104	60	74.6667
11:30:00	105/60	146	60					105	60	75

## Sheet: 8
Time	BP	HR	NIPE	Fentanyl				SBP	DBP	MAP
09:10:00	108/55	119	41	10				108	55	72.6667
09:15:00	95/50	118	48					95	50	65
09:20:00	95/48	122	52					95	48	63.6667
09:25:00	90/39	145	53					90	39	56
09:30:00	94/45	147	55					94	45	61.3333
09:35:00	107/55	156	49	5				107	55	72.3333
09:40:00	98/40	146	56					98	40	59.3333
09:45:00	90/45	145	57					90	45	60
09:50:00	95/40	146	59					95	40	58.3333
09:55:00	94/42	148	59					94	42	59.3333
10:00:00	90/41	148	60					90	41	57.3333
10:05:00	98/42	145	60					98	42	60.6667
10:10:00	94/40	144	59					94	40	58
10:15:00	95/41	142	59					95	41	59
10:20:00	105/45	148	55	5				105	45	65
10:25:00	95/43	143	61					95	43	60.3333
10:30:00	96/45	142	63					96	45	62
10:35:00	95/41	142	64					95	41	59
10:40:00	96/40	143	65					96	40	58.6667
10:45:00	91/39	141	62					91	39	56.3333
10:50:00	100/40	142	62					100	40	60
10:55:00	98/39	142	60					98	39	58.6667
11:00:00	98/41	150	59	5				98	41	60
11:05:00	90/40	138	63					90	40	56.6667
11:10:00	91/39	139	65					91	39	56.3333
11:15:00	93/41	138	66					93	41	58.3333
11:20:00	95/49	137	66					95	49	64.3333
11:25:00	98/50	135	68					98	50	66
11:30:00	94/44	136	71					94	44	60.6667
11:35:00	93/45	135	72					93	45	61
11:40:00	95/47	135	72					95	47	63
11:45:00	98/45	136	69					98	45	62.6667
11:50:00	100/45	138	62					100	45	63.3333
11:55:00	110/45	139	56					110	45	66.6667
12:00:00	100/44	140	54					100	44	62.6667
12:05:00	110/55	148	54	5				110	55	73.3333
12:10:00	112/54	147	57					112	54	73.3333

## Sheet: 9
Time	BP	HR	NIPE	Fentanyl				SBP	DBP	MAP
09:40:00	122/91	130	32	10				122	91	101.333
09:45:00	110/85	129	47					110	85	93.3333
09:50:00	95/59	125	56					95	59	71
09:55:00	91/49	125	57					91	49	63
10:00:00	92/45	132	58					92	45	60.6667
10:05:00	91/49	128	61					91	49	63
10:10:00	89/49	121	62					89	49	62.3333
10:15:00	85/53	152	62					85	53	63.6667
10:20:00	87/39	150	63					87	39	55
10:25:00	98/40	159	53	4				98	40	59.3333
10:30:00	90/41	156	57					90	41	57.3333
10:35:00	90/40	155	58					90	40	56.6667
10:40:00	85/30	155	60					85	30	48.3333
10:45:00	88/35	151	60					88	35	52.6667
10:50:00	88/39	156	61					88	39	55.3333
10:55:00	89/39	154	62					89	39	55.6667
11:00:00	88/36	153	63					88	36	53.3333
11:05:00	89/41	152	65					89	41	57
11:10:00	89/40	152	62					89	40	56.3333
11:15:00	88/35	155	61	4				88	35	52.6667
11:20:00	87/39	157	63					87	39	55
11:25:00	89/39	160	63					89	39	55.6667
11:30:00	89/40	149	62					89	40	56.3333
11:35:00	89/40	150	60					89	40	56.3333
11:40:00	88/41	149	60					88	41	56.6667
11:45:00	87/40	151	58					87	40	55.6667
11:50:00	85/41	148	57					85	41	55.6667
11:55:00	86/40	148	58					86	40	55.3333
12:00:00	90/48	158	49	4				90	48	62
12:05:00	86/41	147	58					86	41	56
12:10:00	82/41	146	59					82	41	54.6667
12:15:00	85/41	145	59					85	41	55.6667
12:20:00	83/42	149	61					83	42	55.6667
12:25:00	82/42	148	62					82	42	55.3333
12:30:00	85/40	144	59	4				85	40	55
12:35:00	87/43	142	58					87	43	57.6667
12:40:00	81/40	148	61					81	40	53.6667
12:45:00	83/39	141	62					83	39	53.6667
12:50:00	88/39	138	63					88	39	55.3333
12:55:00	89/38	138	62					89	38	55
13:00:00	95/50	140	59	4				95	50	65

## Sheet: 10
Time	BP	HR	NIPE	Fentanyl				SBP	DBP	MAP
09:45:00	80/45	172	46	10				80	45	56.6667
09:50:00	79/45	170	52					79	45	56.3333
09:55:00	79/45	165	57					79	45	56.3333
10:00:00	75/41	168	58					75	41	52.3333
10:05:00	75/35	166	59					75	35	48.3333
10:10:00	78/39	165	60					78	39	52
10:15:00	75/35	160	61					75	35	48.3333
10:20:00	76/36	155	62					76	36	49.3333
10:25:00	84/45	155	64	5				84	45	58
10:30:00	78/38	148	63					78	38	51.3333
10:35:00	79/35	145	62					79	35	49.6667
10:40:00	79/33	140	61					79	33	48.3333
10:45:00	71/35	141	61					71	35	47
10:50:00	79/36	142	60					79	36	50.3333
10:55:00	78/35	142	59					78	35	49.3333
11:00:00	79/33	140	59					79	33	48.3333
11:05:00	80/34	142	57					80	34	49.3333
11:10:00	85/35	142	56					85	35	51.6667
11:15:00	84/36	141	55					84	36	52
11:20:00	95/45	140	51	5				95	45	61.6667
11:25:00	86/36	135	58					86	36	52.6667
11:30:00	85/35	131	59					85	35	51.6667
11:35:00	88/35	135	62					88	35	52.6667
11:40:00	87/39	135	63					87	39	55
11:45:00	99/38	134	63					99	38	58.3333
11:50:00	105/48	135	64					105	48	67

[truncated: 25 more sheets: 11, 12, 13, 14, 15, 16, 17, 18, 19, 20, 21, 22, 23, 24, 25, 26, 27, 28, 29, 30 …]
