# Supplementary material for: Effectiveness of newborn infant parasympathetic evaluation (NIPE) index for guiding intraoperative fentanyl administration in children under 2 years: a randomized controlled trial
Source: PeerJ. 2024 Oct 8;12:e18267. doi: 10.7717/peerj.18267 (PMC11468978; doi:10.7717/peerj.18267)
Supplement: Supplemental Information 3 [file peerj-12-18267-s003.xlsx]

## Sheet: 1
Time	BP	HR	NIPE	Fentanyl(mcg)				SBP	DBP	MAP
09:05:00	88/50	144	45	3				88	50	62.6667
09:10:00	89/53	146	49					89	53	65
09:15:00	88/62	136	56					88	62	70.6667
09:20:00	78/48	138	60					78	48	58
09:25:00	70/42	136	63					70	42	51.3333
09:30:00	72/42	135	65					72	42	52
09:35:00	74/46	134	67					74	46	55.3333
09:40:00	76/44	138	64					76	44	54.6667
09:45:00	70/44	142	65					70	44	52.6667
09:50:00	70/40	140	65					70	40	50
09:55:00	72/44	143	64					72	44	53.3333
10:00:00	72/42	140	63					72	42	52
10:05:00	70/42	142	60					70	42	51.3333
10:10:00	78/46	154	54					78	46	56.6667
10:15:00	80/48	158	39	1				80	48	58.6667
10:20:00	78/45	152	48					78	45	56
10:25:00	78/44	147	52					78	44	55.3333
10:30:00	76/44	148	59					76	44	54.6667
10:35:00	74/42	140	65					74	42	52.6667
10:40:00	76/42	138	66					76	42	53.3333
10:45:00	70/42	136	65					70	42	51.3333
10:50:00	72/42	135	64					72	42	52
10:55:00	72/44	136	62					72	44	53.3333
11:00:00	74/44	134	56					74	44	54
11:05:00	78/45	144	52					78	45	56
11:10:00	78/48	142	45	1				78	48	58
11:15:00	76/40	140	50					76	40	52
11:20:00	72/40	140	51					72	40	50.6667
11:25:00	86/48	152	50					86	48	60.6667
11:30:00	88/50	158	49	1				88	50	62.6667
11:35:00	80/46	154	50					80	46	57.3333
11:40:00	78/44	150	52					78	44	55.3333
11:45:00	74/40	150	56					74	40	51.3333
11:50:00	79/46	156	55					79	46	57
11:55:00	80/48	154	52					80	48	58.6667
12:00:00	82/42	148	48	1				82	42	55.3333
12:05:00	80/44	147	52					80	44	56
12:10:00	78/48	148	60					78	48	58
12:15:00	80/46	148	63					80	46	57.3333
12:20:00	82/48	150	64					82	48	59.3333
12:25:00	82/42	152	66					82	42	55.3333
12:30:00	80/44	150	67					80	44	56
12:35:00	80/46	152	65					80	46	57.3333

## Sheet: 2
	BP	HR	NIPE	Fentanyl				SBP	DBP	MAP
11:35:00	118/67	168	40	20				118	67	84
11:40:00	102/62	164	48					102	62	75.3333
11:45:00	98/50	162	52					98	50	66
11:50:00	102/60	168	54					102	60	74
11:55:00	104/62	170	49	10				104	62	76
12:00:00	97/53	148	53					97	53	67.6667
12:05:00	98/52	147	56					98	52	67.3333
12:10:00	100/56	160	54					100	56	70.6667
12:15:00	102/58	158	49	10				102	58	72.6667
12:20:00	98/54	148	52					98	54	68.6667
12:25:00	96/52	149	54					96	52	66.6667
12:30:00	100/58	150	56					100	58	72
12:35:00	98/52	152	55					98	52	67.3333
12:40:00	108/60	160	53					108	60	76
12:45:00	118/72	160	48	10				118	72	87.3333
12:50:00	95/56	152	52					95	56	69
12:55:00	96/54	150	58					96	54	68
13:00:00	98/53	148	60					98	53	68
13:05:00	96/52	149	62					96	52	66.6667
13:10:00	100/60	144	60					100	60	73.3333
13:15:00	110/62	146	52					110	62	78
13:20:00	112/63	142	50					112	63	79.3333
13:25:00	107/60	143	49	5				107	60	75.6667
13:30:00	98/59	138	52					98	59	72
13:35:00	97/58	135	59					97	58	71
13:40:00	94/52	132	62					94	52	66
13:45:00	98/57	133	60					98	57	70.6667
13:50:00	102/57	130	62					102	57	72
13:55:00	103/59	140	54					103	59	73.6667
14:00:00	110/60	152	50					110	60	76.6667
14:05:00	108/58	150	46	5				108	58	74.6667
14:10:00	106/57	134	51					106	57	73.3333
14:15:00	100/55	135	53					100	55	70
14:20:00	99/53	131	58					99	53	68.3333
14:25:00	96/50	133	61					96	50	65.3333
14:30:00	95/51	135	62					95	51	65.6667
14:35:00	100/54	138	59					100	54	69.3333
14:40:00	102/53	144	60					102	53	69.3333
14:45:00	100/50	146	57					100	50	66.6667
14:50:00	99/52	145	56					99	52	67.6667
14:55:00	98/52	147	54					98	52	67.3333
15:00:00	108/60	150	56					108	60	76
15:05:00	109/62	170	54					109	62	77.6667
15:10:00	110/63	169	53					110	63	78.6667

## Sheet: 3
Time	BP	HR	NIPE	Fentanyl				SBP	DBP	MAP
08:45:00	82/57	153	54	5				82	57	65.3333
08:50:00	84/56	148	56					84	56	65.3333
08:55:00	86/55	144	60					86	55	65.3333
09:00:00	85/52	126	62					85	52	63
09:05:00	80/50	122	63					80	50	60
09:10:00	80/52	124	63					80	52	61.3333
09:15:00	88/60	125	62					88	60	69.3333
09:20:00	90/60	148	55					90	60	70
09:25:00	88/62	146	48	5				88	62	70.6667
09:30:00	84/59	149	49					84	59	67.3333
09:35:00	70/52	148	53					70	52	58
09:40:00	79/50	145	58					79	50	59.6667
09:45:00	78/49	140	58					78	49	58.6667
09:50:00	76/48	138	60					76	48	57.3333
09:55:00	78/50	134	61					78	50	59.3333
10:00:00	77/49	136	61					77	49	58.3333
10:05:00	74/48	138	62					74	48	56.6667
10:10:00	75/50	139	63					75	50	58.3333
10:15:00	76/49	138	60					76	49	58
10:20:00	85/62	145	54					85	62	69.6667
10:25:00	86/60	146	50	5				86	60	68.6667
10:30:00	74/42	144	55					74	42	52.6667
10:35:00	72/42	139	56					72	42	52
10:40:00	78/45	139	57					78	45	56
10:45:00	80/48	140	60					80	48	58.6667
10:50:00	82/50	140	62					82	50	60.6667
10:55:00	84/52	150	63					84	52	62.6667
11:00:00	85/52	160	63					85	52	63
11:05:00	85/60	164	65					85	60	68.3333

## Sheet: 4
Time	BP	HR	NIPE	Fentanyl				SBP	DBP	MAP
09:00:00	110/50	140	45	15				110	50	70
09:05:00	98/48	138	52					98	48	64.6667
09:10:00	100/50	138	56					100	50	66.6667
09:15:00	96/42	136	58					96	42	60
09:20:00	88/43	136	58					88	43	58
09:25:00	87/44	138	56					87	44	58.3333
09:30:00	88/42	135	56					88	42	57.3333
09:35:00	100/58	142	52					100	58	72
09:40:00	110/60	148	46	10				110	60	76.6667
09:45:00	92/54	144	52					92	54	66.6667
09:50:00	93/57	138	54					93	57	69
09:55:00	90/50	136	60					90	50	63.3333
10:00:00	94/50	135	62					94	50	64.6667
10:05:00	88/48	133	65					88	48	61.3333
10:10:00	82/47	132	66					82	47	58.6667
10:15:00	80/42	134	66					80	42	54.6667
10:20:00	82/42	133	65					82	42	55.3333
10:25:00	90/50	130	65					90	50	63.3333
10:30:00	92/50	140	64					92	50	64
10:35:00	93/52	138	64					93	52	65.6667
10:40:00	94/50	132	62					94	50	64.6667
10:45:00	96/53	133	60					96	53	67.3333
10:50:00	97/54	134	58					97	54	68.3333
10:55:00	100/60	144	52					100	60	73.3333
11:00:00	98/48	142	48	5				98	48	64.6667
11:05:00	92/49	140	51					92	49	63.3333
11:10:00	93/47	138	53					93	47	62.3333
11:15:00	98/50	133	58					98	50	66
11:20:00	100/54	132	52					93	50	64.3333
11:25:00	98/55	133	48	5				90	48	62
11:30:00	96/50	134	52					88	44	58.6667
11:35:00	92/48	130	60					92	48	62.6667
11:40:00	94/50	131	62					94	50	64.6667
11:45:00	94/50	133	63					94	50	64.6667
11:50:00	90/48	128	63					90	48	62
11:55:00	90/49	127	64					90	49	62.6667
12:00:00	90/48	129	66					90	48	62
12:05:00	90/50	130	65					90	50	63.3333
12:10:00	92/50	128	63					92	50	64
12:15:00	90/46	126	63					90	46	60.6667
12:20:00	90/45	128	57					90	45	60
12:25:00	92/44	130	50	5				92	44	60
12:30:00	91/47	127	52					91	47	61.6667
12:35:00	92/48	125	53					92	48	62.6667
12:40:00	94/50	120	53					94	50	64.6667
12:45:00	94/50	120	52					88	48	61.3333
12:50:00	92/50	130	52					87	48	61
12:55:00	90/52	138	42	5				90	52	64.6667
13:00:00	94/54	135	41	5				94	54	67.3333
13:05:00	90/53	136	43	5				90	53	65.3333
13:10:00	87/46	124	50					87	46	59.6667
13:15:00	84/46	122	58					84	46	58.6667
13:20:00	85/45	120	64					85	45	58.3333
13:25:00	100/50	120	67					100	50	66.6667
13:30:00	102/49	128	68					102	49	66.6667
13:35:00	101/48	125	68					101	48	65.6667
13:40:00	102/57	127	70					102	57	72
13:45:00	110/58	130	67					110	58	75.3333
13:50:00	110/60	132	65					110	60	76.6667

## Sheet: 5
Time	BP	HR	NIPE	Fentanyl				SBP	DBP	MAP
09:05:00	90/50	148	36	10				90	50	63.3333
09:10:00	90/48	146	48					90	48	62
09:15:00	88/46	145	52					88	46	60
09:20:00	90/45	140	59					90	45	60
09:25:00	80/40	147	60					80	40	53.3333
09:30:00	80/42	150	62					80	42	54.6667
09:35:00	78/43	152	63					78	43	54.6667
09:40:00	78/42	154	65					78	42	54
09:45:00	70/38	152	66					70	38	48.6667
09:50:00	70/36	152	66					70	36	47.3333
09:55:00	72/38	150	67					72	38	49.3333
10:00:00	77/39	150	68					77	39	51.6667
10:05:00	80/39	150	66					80	39	52.6667
10:10:00	80/38	152	62					80	38	52
10:15:00	81/39	148	63					81	39	53
10:20:00	82/37	149	61					82	37	52
10:25:00	89/45	154	59					89	45	59.6667
10:30:00	90/43	152	50	2.5				90	43	58.6667
10:35:00	88/42	146	53					88	42	57.3333
10:40:00	85/40	145	54					85	40	55
10:45:00	81/41	145	56					81	41	54.3333
10:50:00	88/40	144	55					88	40	56
10:55:00	90/44	152	53					85	40	55
11:00:00	89/42	150	47	2.5				87	42	57
11:05:00	86/43	146	54					86	43	57.3333
11:10:00	90/45	147	59					90	45	60
11:15:00	89/44	145	61					89	44	59
11:20:00	90/43	148	63					90	43	58.6667
11:25:00	88/40	142	63					88	40	56
11:30:00	82/39	143	65					82	39	53.3333
11:35:00	88/41	144	67					88	41	56.6667
11:40:00	87/42	145	65					87	42	57
11:45:00	88/40	145	63					88	40	56
11:50:00	85/41	144	62					85	41	55.6667
11:55:00	87/42	146	60					87	42	57
12:00:00	89/40	145	60					89	40	56.3333
12:05:00	90/50	145	56					90	50	63.3333
12:10:00	90/48	147	49	5				90	48	62
12:15:00	91/52	153	50					91	52	65

## Sheet: 6
Time	BP	HR	NIPE	Fentanyl				SBP	DBP	MAP
00:35:00	108/58	148	46	10				108	58	74.6667
00:40:00	100/57	146	50					100	57	71.3333
00:45:00	96/58	145	55					96	58	70.6667
00:50:00	90/48	143	61					90	48	62
00:55:00	88/46	140	62					88	46	60
01:00:00	86/45	138	63					86	45	58.6667
01:05:00	85/45	135	64					85	45	58.3333
01:10:00	80/42	136	66					80	42	54.6667
01:15:00	86/44	137	54					86	44	58
01:20:00	88/46	138	46	5				88	46	60
01:25:00	85/42	132	50					85	42	56.3333
01:30:00	86/40	135	58					86	40	55.3333
01:35:00	82/41	133	59					82	41	54.6667
01:40:00	80/40	136	62					80	40	53.3333
01:45:00	80/39	134	62					80	39	52.6667
01:50:00	82/42	135	64					82	42	55.3333
01:55:00	81/41	136	65					81	41	54.3333
02:00:00	80/40	134	63					80	40	53.3333
02:05:00	92/54	142	52					90	50	63.3333
02:10:00	90/51	144	48	2.5				88	46	60
02:15:00	88/46	137	50					83	44	57
02:20:00	80/40	135	56					80	40	53.3333
02:25:00	81/41	132	60					81	41	54.3333
02:30:00	80/38	130	63					80	38	52
02:35:00	80/39	131	63					80	39	52.6667
02:40:00	82/40	130	64					82	40	54
02:45:00	83/41	132	65					83	41	55
02:50:00	85/43	130	62					85	43	57
02:55:00	86/42	130	62					86	42	56.6667
03:00:00	86/40	128	60					86	40	55.3333
03:05:00	92/57	130	56					89	54	65.6667
03:10:00	90/56	128	50	2.5				90	56	67.3333
03:15:00	92/57	126	56					92	57	68.6667
03:20:00	92/58	130	58					92	58	69.3333
03:25:00	94/59	152	60					94	59	70.6667
03:30:00	99/60	150	65					99	60	73
03:35:00	100/60	150	66					100	60	73.3333

## Sheet: 7
Time	BP	HR	NIPE	Fentanyl				SBP	DBP	MAP
09:30:00	90/60	160	42	10				90	60	70
09:35:00	80/50	150	49					80	50	60
09:40:00	78/48	152	52					78	48	58
09:45:00	80/48	150	60					80	48	58.6667
09:50:00	80/49	151	63					80	49	59.3333
09:55:00	81/42	150	63					81	42	55
10:00:00	82/44	148	64					82	44	56.6667
10:05:00	82/43	150	66					82	43	56
10:10:00	84/50	152	65					84	50	61.3333
10:15:00	80/48	150	64					80	48	58.6667
10:20:00	82/46	151	65					82	46	58
10:25:00	82/44	158	67					82	44	56.6667
10:30:00	88/50	160	68					88	50	62.6667

## Sheet: 8
Time	BP	HR	NIPE	Fentanyl				SBP	DBP	MAP
09:00:00	90/60	150	46	10				90	60	70
09:05:00	88/60	148	58					88	60	69.3333
09:10:00	80/40	149	61					80	40	53.3333
09:15:00	78/38	147	62					78	38	51.3333
09:20:00	75/37	142	63					75	37	49.6667
09:25:00	70/40	140	65					70	40	50
09:30:00	70/39	136	65					70	39	49.3333
09:35:00	70/37	138	67					70	37	48
09:40:00	71/39	138	65					71	39	49.6667
09:45:00	71/37	139	64					71	37	48.3333
09:50:00	72/38	137	65					72	38	49.3333
09:55:00	60/35	138	64					60	35	43.3333
10:00:00	60/34	139	65					60	34	42.6667
10:05:00	62/37	135	67					62	37	45.3333
10:10:00	60/32	130	66					60	32	41.3333
10:15:00	61/34	131	65					61	34	43
10:20:00	63/37	130	64					63	37	45.6667
10:25:00	73/42	138	57					73	42	52.3333
10:30:00	71/40	135	50	2.5				71	40	50.3333
10:35:00	69/37	130	52					69	37	47.6667
10:40:00	66/38	128	62					66	38	47.3333
10:45:00	68/38	127	64					68	38	48
10:50:00	67/38	124	65					67	38	47.6667
10:55:00	69/39	123	65					69	39	49
11:00:00	75/42	122	67					75	42	53
11:05:00	82/58	130	68					82	58	66
11:10:00	88/57	134	68					88	57	67.3333

## Sheet: 9
Time	BP	HR	NIPE	Fentanyl				SBP	DBP	MAP
00:15:00	102/60	128	40	15				102	60	74
00:20:00	100/58	126	56					100	58	72
00:25:00	90/56	123	62					90	56	67.3333
00:30:00	88/54	122	63					88	54	65.3333
00:35:00	87/52	123	60					87	50	62.3333
00:40:00	92/56	130	52					92	56	68
00:45:00	90/52	128	48	4				90	52	64.6667
00:50:00	86/44	124	54					86	44	58
00:55:00	81/40	123	60					81	40	53.6667
01:00:00	80/40	124	61					80	40	53.3333
01:05:00	78/38	124	62					78	38	51.3333
01:10:00	79/39	120	64					79	39	52.3333
01:15:00	80/40	121	65					80	40	53.3333
01:20:00	79/38	119	67					79	38	51.6667
01:25:00	78/38	118	65					78	38	51.3333
01:30:00	79/38	119	63					79	38	51.6667
01:35:00	78/40	117	60					78	40	52.6667
01:40:00	88/46	120	54					88	46	60
01:45:00	92/50	122	47	4				92	50	64
01:50:00	90/50	118	53					90	50	63.3333
01:55:00	90/51	115	59					90	51	64
02:00:00	90/48	110	61					90	48	62
02:05:00	92/48	110	62					92	48	62.6667
02:10:00	92/42	111	65					92	42	58.6667
02:15:00	90/40	108	65					90	40	56.6667
02:20:00	90/38	109	66					90	38	55.3333
02:25:00	90/41	110	67					90	41	57.3333
02:30:00	92/41	108	68					92	41	58
02:35:00	100/52	112	65					100	52	68
02:40:00	102/54	115	64					102	54	70
02:45:00	103/55	118	64					103	55	71

## Sheet: 10
Time	BP	HR	NIPE	Fentanyl				SBP	DBP	MAP
09:15:00	80/42	170	47	6				80	42	54.6667
09:20:00	82/41	168	56					82	41	54.6667
09:25:00	80/38	167	60					80	38	52
09:30:00	78/36	168	62					78	36	50
09:35:00	76/35	160	62					76	35	48.6667
09:40:00	72/34	158	63					72	34	46.6667
09:45:00	73/38	157	65					73	38	49.6667
09:50:00	72/36	152	65					72	36	48
09:55:00	74/35	153	66					74	35	48
10:00:00	70/32	150	64					70	32	44.6667
10:05:00	70/33	151	63					70	33	45.3333
10:10:00	70/34	148	61					70	34	46
10:15:00	71/33	149	62					71	33	45.6667
10:20:00	72/32	145	63					72	32	45.3333
10:25:00	70/31	143	65					70	31	44
10:30:00	68/32	140	64					68	32	44
10:35:00	70/30	138	63					70	30	43.3333
10:40:00	70/32	138	64					70	32	44.6667
10:45:00	71/32	139	65					71	32	45
10:50:00	75/36	137	66					75	36	49
10:55:00	78/38	138	65					78	38	51.3333
11:00:00	78/37	140	63					78	37	50.6667
11:05:00	79/36	139	64					79	36	50.3333
11:10:00	78/35	138	64					78	35	49.3333
11:15:00	74/34	139	65					74	34	47.3333
11:20:00	76/35	141	62					76	35	48.6667
11:25:00	80/40	148	53					80	40	53.3333
11:30:00	82/42	150	48	3				82	42	55.3333
11:35:00	79/41	144	55					79	41	53.6667
11:40:00	78/38	142	60					78	38	51.3333
11:45:00	80/50	143	63					80	50	60
11:50:00	88/51	142	64					88	51	63.3333
11:55:00	88/50	143	65					88	50	62.6667
12:00:00	80/50	143	65					80	50	60
12:05:00	82/51	142	67					82	51	61.3333
12:10:00	88/54	140	67					88	54	65.3333

[truncated: 25 more sheets: 11, 12, 13, 14, 15, 16, 17, 18, 19, 20, 21, 22, 23, 24, 25, 26, 27, 28, 29, 30 …]
